# Supplementary material for: Psychological distress and trajectories of sleep duration among Australian adolescents: a prospective cohort study
Source: HighWire-hosted journal article supplement (doi:10.1136/bmjopen-2023-080665), 2024-09-01
Supplement: bmjopen-2023-080665supp001_data_supplement.pdf [file bmjopen-2023-080665supp001_data_supplement.pdf]

Supplementary material

Supplementary Table 1: Sociodemographic profiles of those responded to the baseline questionnaire and responded at least one follow-up sleep EMAs.

| Characteristics       | Total (N=1295)    | Total (N=343)      | p-value |
|-----------------------|-------------------|--------------------|---------|
| Gender                |                   |                    |         |
| Male                  | 228(17.61)        | 61(17.78)          |         |
| Female                | 1045(80.69)       | 273(79.59)         |         |
| Other                 | 22(1.7)           | 9(2.62)            | 0.4108  |
| Age                   |                   |                    |         |
| median (IQR)          | 17(16,18)         | 17(16,18)          | 0.8253  |
| BMI                   |                   |                    |         |
| median (IQR)          | 22.07(19.95,25.1) | 22.04(19.84,24.71) | 0.7232  |
| BMI category          |                   |                    |         |
| Underweight           | 100(8.08)         | 20(6.04)           |         |
| Normal                | 775(62.6)         | 222(67.07)         |         |
| Overweight            | 245(19.79)        | 61(18.43)          |         |
| Obese                 | 118(9.53)         | 28(8.46)           | 0.3253  |
| Year of school        |                   |                    |         |
| Year 7                | 2(0.15)           | 1(0.29)            |         |
| Year 8                | 30(2.32)          | 8(2.33)            |         |
| Year 9                | 74(5.71)          | 14(4.08)           |         |
| Year 10               | 162(12.51)        | 40(11.66)          |         |
| Year 11               | 101(7.8)          | 37(10.79)          |         |
| Year 12               | 280(21.62)        | 79(23.03)          |         |
| Not at school         | 47(3.63)          | 14(4.08)           |         |
| Finished school       | 599(46.25)        | 150(43.73)         | 0.4133  |
| Trade certificate     |                   |                    |         |
| No                    | 525(81.4)         | 137(83.54)         |         |
| Yes                   | 120(18.6)         | 27(16.46)          | 0.4819  |
| Work at a job         |                   |                    |         |
| No                    | 539(41.82)        | 154(45.03)         |         |
| Yes                   | 750(58.18)        | 188(54.97)         | 0.2289  |
| Looking for a job     |                   |                    |         |
| No                    | 220(40.82)        | 62(40.26)          |         |
| Yes                   | 319(59.18)        | 92(59.74)          | 0.8875  |
| Work for salary       |                   |                    |         |
| No                    | 78(10.4)          | 20(10.64)          |         |
| Yes                   | 672(89.6)         | 168(89.36)         | 0.9148  |
| Weekly work hours     |                   |                    |         |
| median (IQR)          | 12(7,20)          | 10(6,16)           | 0.0785  |
| Language at home      |                   |                    |         |
| English               | 1097(84.84)       | 291(84.84)         |         |
| Other                 | 196(15.16)        | 52(15.16)          | 0.9999  |
| Socioeconomic status  |                   |                    |         |
| 5 Least disadvantaged | 220(33.69)        | 102(35.29)         |         |
| 4                     | 126(19.3)         | 52(17.99)          |         |
| 3                     | 100(15.31)        | 44(15.22)          |         |
| 2                     | 99(15.16)         | 41(14.19)          |         |
| 1 Most disadvantaged  | 108(16.54)        | 50(17.3)           | 0.9438  |

Note: Chi-square goodness of fit test was employed to obtain p-values for categorical variables and Mann-Whitney U test was employed to obtain p-values for quantitative variables.

**Supplementary Figure 1: Number of responses to sleep EMA over 16-week follow-up.**

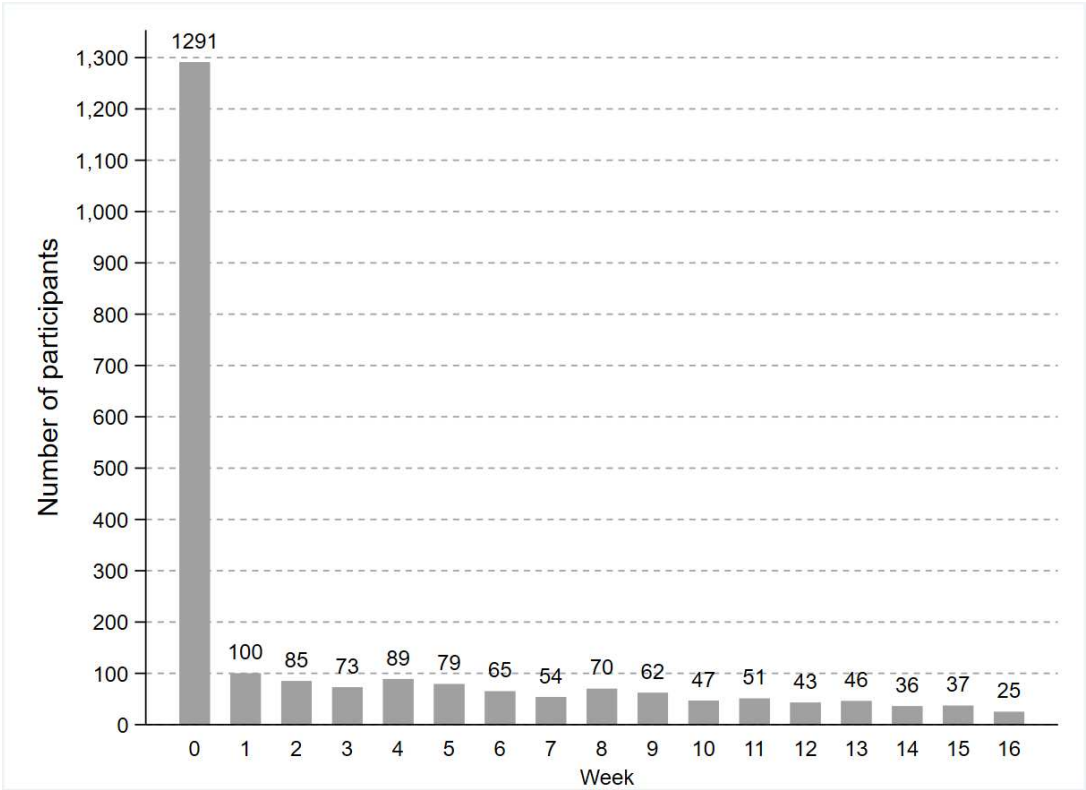

Note: week 0 indicates the baseline. Only 343 individuals out of 1295 responded to at least one EMA and it is possible that a participant did not respond to sleep EMA at week ‘n’ but responded at week ‘n+1’.

**Supplementary Figure 2: The association between hours of sleep duration and psychological distress (K6), social media use, hours of homework, and other socio-demographic factors among adolescents aged 13-19 years.**

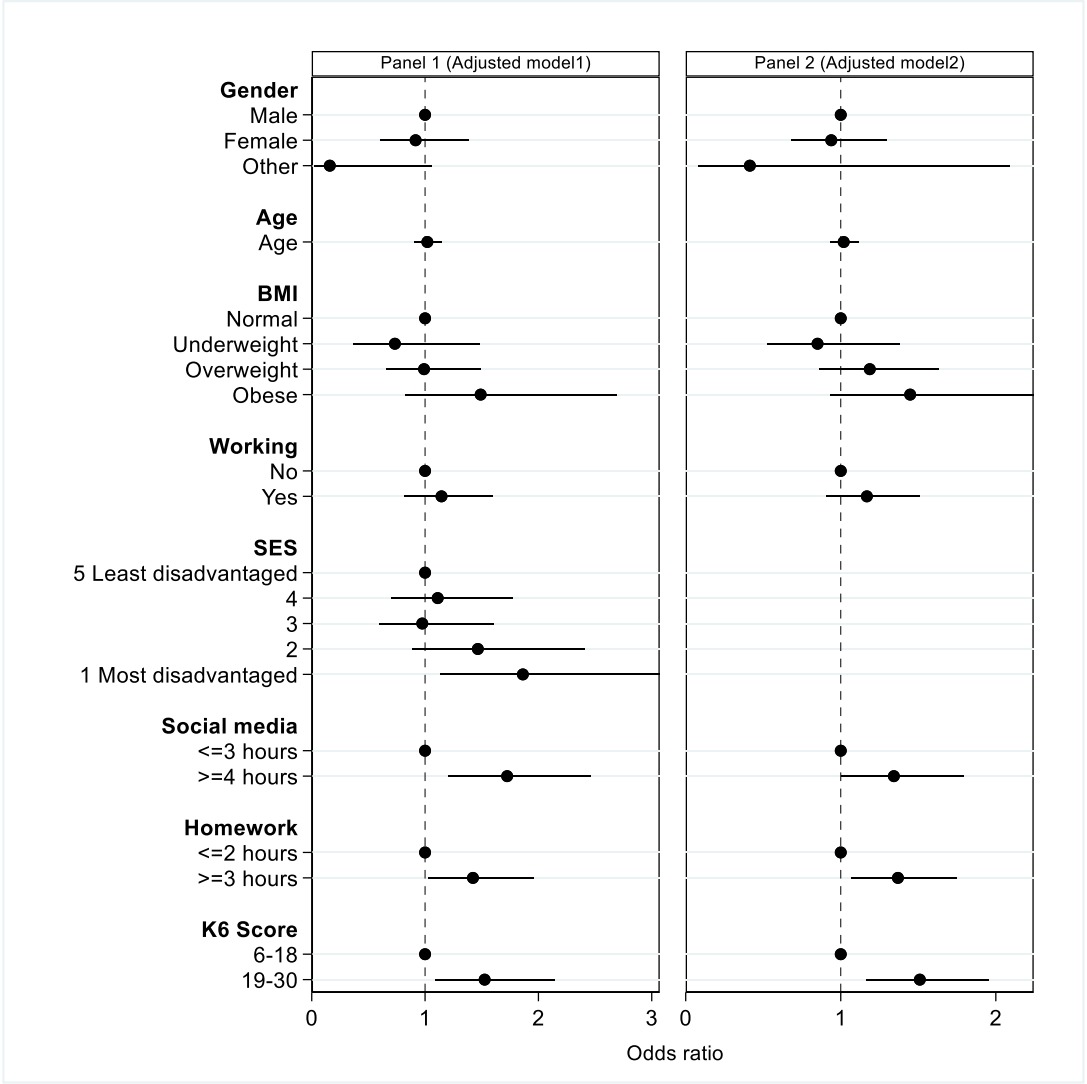

Adjusted model 1 included all the variables as covariates whereas Adjusted model 2 did not include socioeconomic status as a covariate. Socioeconomic status was missing for nearly 50% of the participants. Therefore, socioeconomic status was excluded from Adjusted model2 to maximise the use of available data in the complete case analysis.
